# Supplementary material
Source: HighWire-hosted journal article supplement (https://gh.bmj.com/content/5/1/e001800)
Supplement: inline-supplementary-material-1 [file inline-supplementary-material-1.pdf]

Online supplement to: Glass, Myer, Lesosky (2019). The role of HIV viral load in mathematical models of HIV transmission and treatment: a review

**Supplementary Table 1: Summary of HIV mathematical models**

| Variable                                                                                                                                                                                                          | Number of studies                           | Percentage |      |
|-------------------------------------------------------------------------------------------------------------------------------------------------------------------------------------------------------------------|---------------------------------------------|------------|------|
| Intervention                                                                                                                                                                                                      | ART                                         | 75         | 25,9 |
|                                                                                                                                                                                                                   | Condom use                                  | 14         | 4,8  |
|                                                                                                                                                                                                                   | Circumcision                                | 16         | 5,5  |
|                                                                                                                                                                                                                   | IDU interventions                           | 2          | 0,7  |
|                                                                                                                                                                                                                   | Microbicides                                | 6          | 2,1  |
|                                                                                                                                                                                                                   | PMTCT                                       | 5          | 1,7  |
|                                                                                                                                                                                                                   | PrEP                                        | 33         | 11,4 |
|                                                                                                                                                                                                                   | Vaccines                                    | 6          | 2,1  |
|                                                                                                                                                                                                                   | Drug resistance                             | 17         | 5,9  |
|                                                                                                                                                                                                                   | HIV Testing                                 | 30         | 10,3 |
|                                                                                                                                                                                                                   | Viral load (incl. monitoring)               | 17         | 5,9  |
|                                                                                                                                                                                                                   | Pharmacokinetic                             | 11         | 3,8  |
| Other                                                                                                                                                                                                             | 58                                          | 20,0       |      |
| Population                                                                                                                                                                                                        | MSM                                         | 40         | 15,2 |
|                                                                                                                                                                                                                   | FSW                                         | 20         | 7,6  |
|                                                                                                                                                                                                                   | IDU/PWID                                    | 15         | 5,7  |
|                                                                                                                                                                                                                   | Pregnant and postpartum/breastfeeding women | 12         | 4,6  |
|                                                                                                                                                                                                                   | Infants                                     | 2          | 0,8  |
|                                                                                                                                                                                                                   | Heterosexual                                | 127        | 48,3 |
|                                                                                                                                                                                                                   | Other                                       | 47         | 17,9 |
| Setting                                                                                                                                                                                                           | Africa                                      | 55         | 17,6 |
|                                                                                                                                                                                                                   | Sub Saharan Africa                          | 123        | 39,4 |
|                                                                                                                                                                                                                   | America (North and South)                   | 32         | 10,3 |
|                                                                                                                                                                                                                   | Europe                                      | 17         | 5,4  |
|                                                                                                                                                                                                                   | Asia                                        | 25         | 8,0  |
|                                                                                                                                                                                                                   | Other                                       | 60         | 19,2 |
| Type of Model                                                                                                                                                                                                     | Deterministic                               | 181        | 64,9 |
|                                                                                                                                                                                                                   | Stochastic                                  | 65         | 23,3 |
|                                                                                                                                                                                                                   | Other                                       | 33         | 11,8 |
|                                                                                                                                                                                                                   | Individual                                  | 65         | 23,3 |
|                                                                                                                                                                                                                   | Population                                  | 183        | 65,6 |
|                                                                                                                                                                                                                   | Other                                       | 31         | 11,1 |
| Models could be included in more than one category and the sections may sum to >100%.                                                                                                                             |                                             |            |      |
| PMTCT – Prevention of mother to child transmission; PrEP - Pre-exposure prophylaxis (PrEP); MSM - Men who have sex with men; FSW - Female sex workers; IDU/PWID - intravenous drug user/ persons who inject drugs |                                             |            |      |
